# Supplementary material for: Hydrogel Contact Lenses Embedded with Amine-Functionalized Large-Pore Mesoporous Silica Nanoparticles with Extended Hyaluronic Acid Release
Source: MDPI journal article supplement (doi:10.3390/nano13172441), 2023-08-28
Supplement: s1 [file s1]

# Hydrogel Contact Lenses Embedded with Amine-Functionalized Large-Pore Mesoporous Silica Nanoparticles with Extended Hyaluronic Acid Release

Chun-Feng Lai \* and Fu-Jia Shiau

Department of Photonics, Feng Chia University, No. 100, Wenhwa Road, Seatwen, Taichung 40724, Taiwan.

\* Correspondence: author: chunflai@fcu.edu.tw

**Table S1.** The N<sub>2</sub> adsorption–desorption parameters of different functionalized LPMSNs.

| Sample         | BET surface area<br>$S_{\text{BET}}$ (m <sup>2</sup> /g) | BET pore volume<br>$V_p$ (cm <sup>3</sup> /g) | BJH pore diameter<br>$V_{\text{BJH}}$ (nm) |
|----------------|----------------------------------------------------------|-----------------------------------------------|--------------------------------------------|
| LPMSN-siloxane | 518.21                                                   | 1.20                                          | 33.1                                       |
| LPMSNs-amine   | 176.80                                                   | 0.76                                          | 31.6                                       |

**Abbreviations:** BET, Brunauer-Emmett-Teller; BJH, Barrett-Joyner-Halenda.**Table S2.** HA/PBS solution with different pH values for all CLs.

| Sample             | Uptake pH Environment | Loaded HA on 24 h<br>[μg/lens] <sup>a)</sup> | Total Released HA in ALF on 120 h<br>[μg/lens] | Released 80% HA Drug | Released HA Enhancement <sup>b)</sup> |
|--------------------|-----------------------|----------------------------------------------|------------------------------------------------|----------------------|---------------------------------------|
| Standard CLs       | 5.5                   | 25.7                                         | 21.9                                           | 8 h                  | —                                     |
|                    | 6.5                   | 30.2                                         | 26.4                                           | 3 h                  | —                                     |
| LPMSN-siloxane CLs | 5.5                   | 80.3                                         | 70.8                                           | 13 h                 | 3.2-fold                              |
|                    | 6.5                   | 65.5                                         | 57.3                                           | 10 h                 | 2.2-fold                              |
| LPMSN-amine CLs    | 5.5                   | 281.2                                        | 275.6                                          | 82 h                 | 12.6-fold                             |
|                    | 6.5                   | 95.6                                         | 87.2                                           | 60 h                 | 3.3-fold                              |

<sup>a)</sup> HA/PBS solution with different pH value is fixed at 0.1 wt% carried out 3 mL for uptake. <sup>b)</sup> Released HA enhancement values are calculated by comparing them to standard CLs.**Table S3.** Kinetic fitting data of desorption between hydrogels and HA for pH 5.5.

| Sample             | Pseudo First-Order Model |             |       | Korsmeyer-Peppas Model |            |       |
|--------------------|--------------------------|-------------|-------|------------------------|------------|-------|
|                    | $k_1$                    | $Q_e$       | $R^2$ | $n$                    | $k_{kp}$   | $R^2$ |
| Standard CLs       | 0.20±0.02                | 23.78±0.23  | 0.94  | 0.06±0.02              | 18.55±1.74 | 0.77  |
| LPMSN-siloxane CLs | 0.09±0.00                | 70.75±0.59  | 0.98  | 0.19±0.03              | 30.56±3.81 | 0.82  |
| LPMSN-amine CLs    | 0.01±0.00                | 379.61±6.63 | 0.999 | 0.71±0.01              | 9.57±0.57  | 0.995 |

**Table S4.** Kinetic fitting data of desorption between hydrogels and HA for pH 6.5.

| Sample             | Pseudo first-order model |            |       | Korsmeyer-Peppas model |            |       |
|--------------------|--------------------------|------------|-------|------------------------|------------|-------|
|                    | $k_1$                    | $Q_e$      | $R^2$ | $n$                    | $k_{kp}$   | $R^2$ |
| Standard CLs       | 0.63±0.06                | 26.35±0.08 | 0.99  | 0.02±0.0               | 24.32±0.33 | 0.98  |
| LPMSN-siloxane CLs | 0.13±0.01                | 54.01±0.36 | 0.98  | 0.14±0.01              | 29.60±1.72 | 0.94  |
| LPMSN-amine CLs    | 24.94±0.00               | 66.23±3.30 | 0.31  | 0.37±0.01              | 15.31±0.82 | 0.99  |

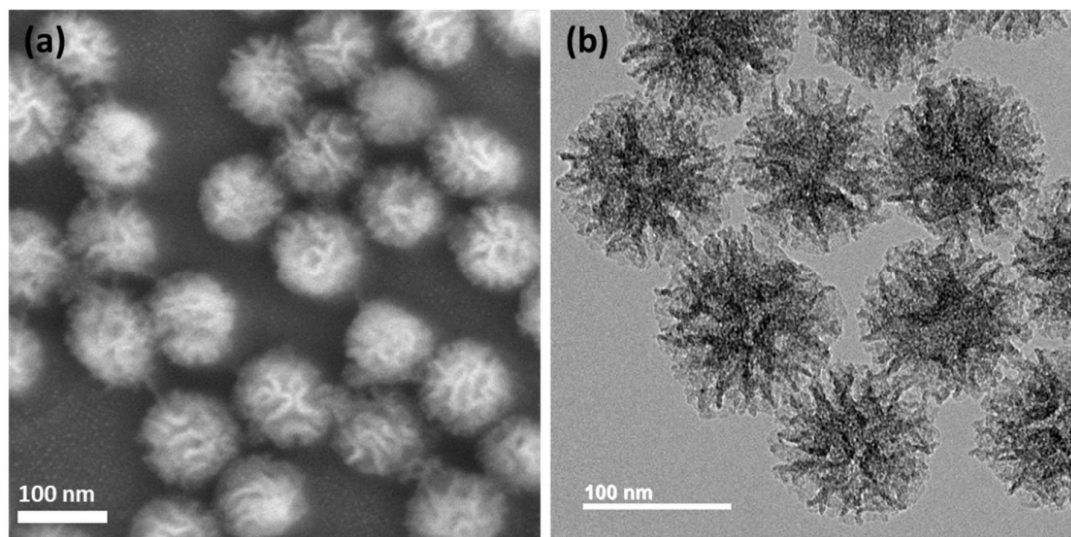

**Figure S1.** (a) FESEM and (b) FETEM images of the LPMSN-siloxane.

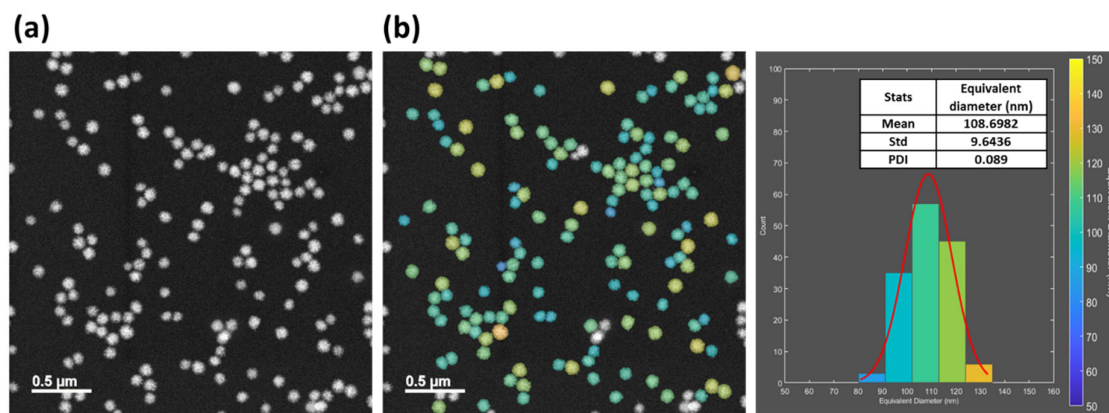

**Figure S2.** Particle size distribution calculated from FETEM pictures. (a) FETEM image and (b) histograms of particle size distribution of LPMSN-amine.

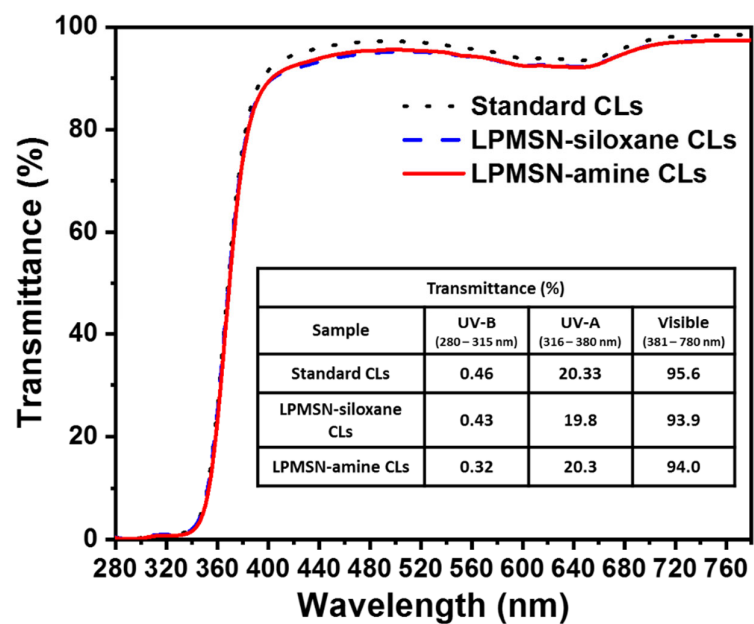

**Figure S3.** Transmittance spectra of the all fabricated CLs. Inset shown the transmittance of different wavelength range. (Average,  $N = 6$ ).

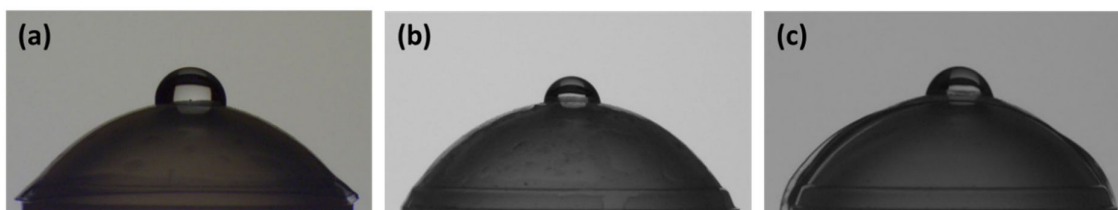

**Figure S4.** Water contact angle photographs of (a) the standard, (b) the LPMSN-siloxane, and (c) the LPMSN-amine CLs without HA, respectively.
